# Supplementary material for: Gene expression profiling of copper-resistant Caco-2 clones
Source: Royal Society of Chemistry journal article supplement (doi:10.1039/d0mt00126k), 2020-08-06
Supplement: d0mt00126k1.pdf [file d0mt00126k1.pdf]

## Supplementary Information

### Gene expression profiling of copper-resistant Caco-2 clones

Charles O'Doherty, Joanne Keenan, Fiona O'Neill, Martin Clynes, Indre Sinkunaite, Karina Horgan, Richard Murphy and Finbarr O'Sullivan

**Fig. S1.** Toxicity profiles of parental and copper resistant Caco-2 clones Or1, Or2, Or3, In1 and In2.

Relative cell survival of Caco-2 clones during exposure to increasing concentrations of A: CuSO<sub>4</sub>, B: Cu proteinate (N>3). X-axis represented in logarithmic scale. Asterisk indicates significant difference from parental Caco-2 (\*\* = P < 0.01)

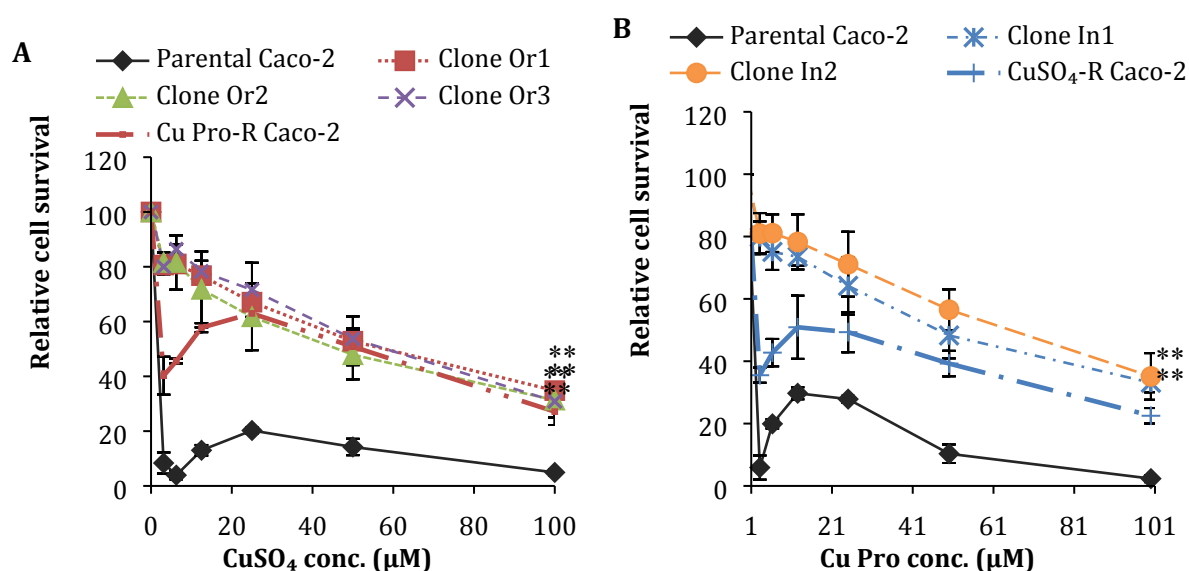

**Fig. S2.** Relative mRNA expression determined by qRT-PCR for: ANXA13, GPx2, AIFM2, ATP7B and UPK1B in Caco-2 and Cu-resistant clones In1, In2, Or1, Or2 and Or3. Parental Caco-2 exposed to 50  $\mu$ M CuSO<sub>4</sub> and Cu proteinate also shown.  $\beta$ -actin used as endogenous control. Logarithmic scale used for ANXA13 and UPK1B for clarity. Asterisk indicates significant difference from parental population (\* = P < 0.05). N=3

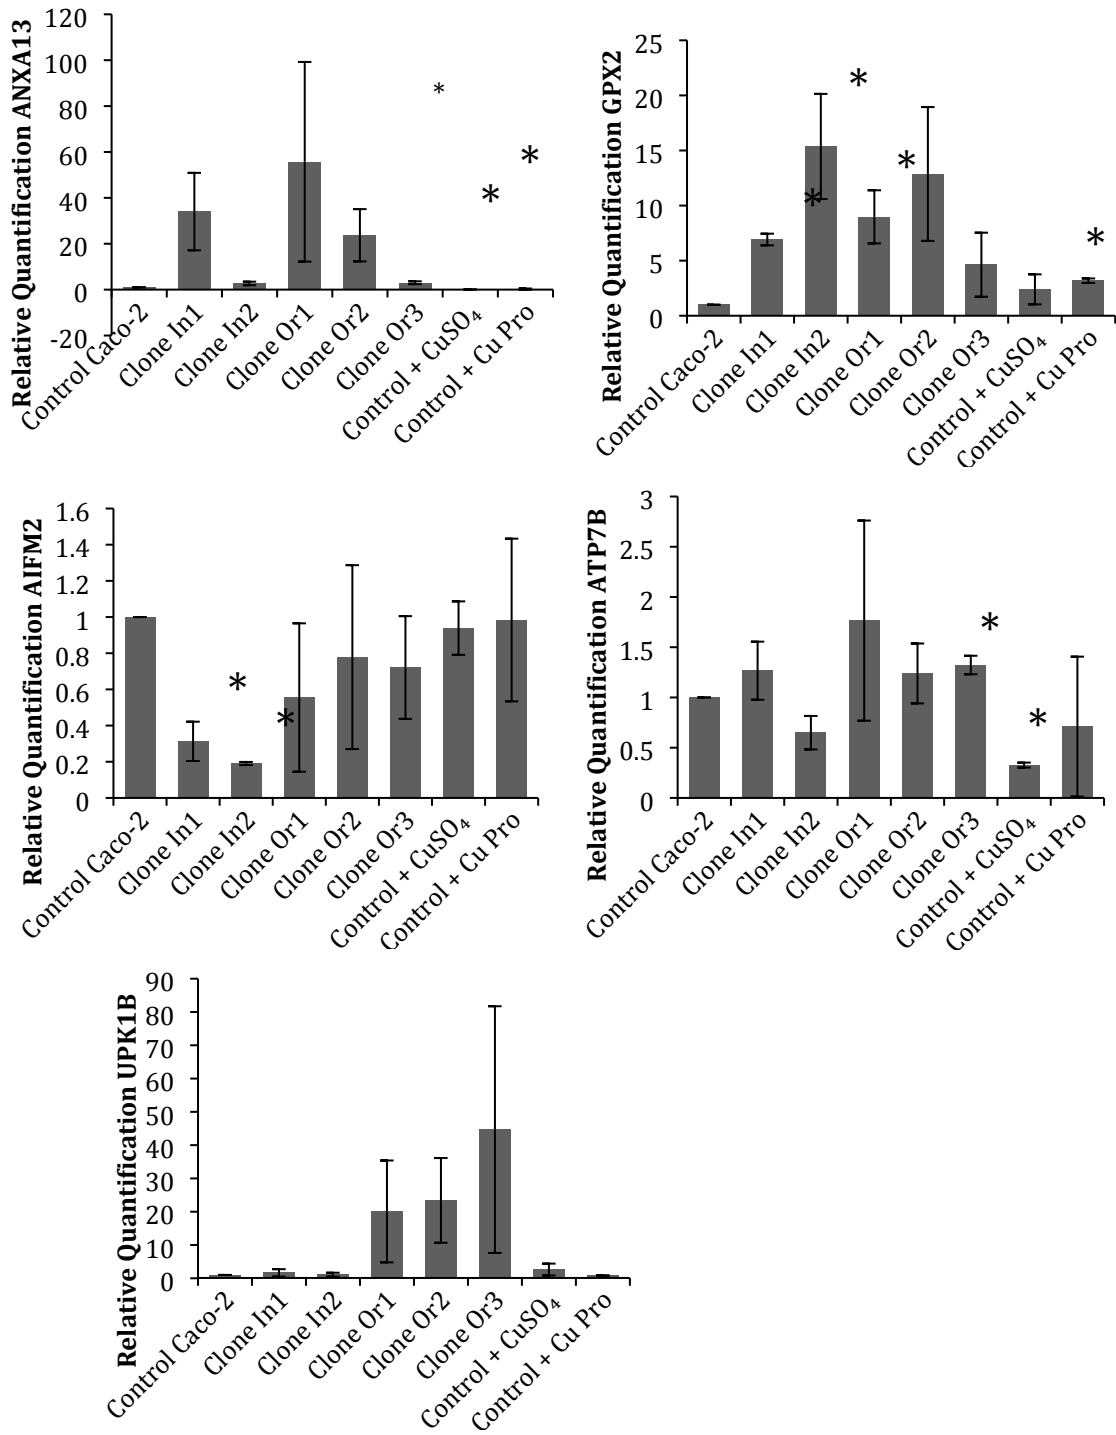

**Fig. S3.** Gene expression relative fold-change as determined by microarray analysis for: ANXA13, GPx2, AIFM2, ATP7B and UPK1B in Caco-2 and Cu-resistant clones In1, In2, Or1, Or2 and Or3. Only targets detected as differentially expressed in the microarray are shown. False discovery rate adjusted P-values are given above each result determined as significantly different relative to control Caco-2. N=3

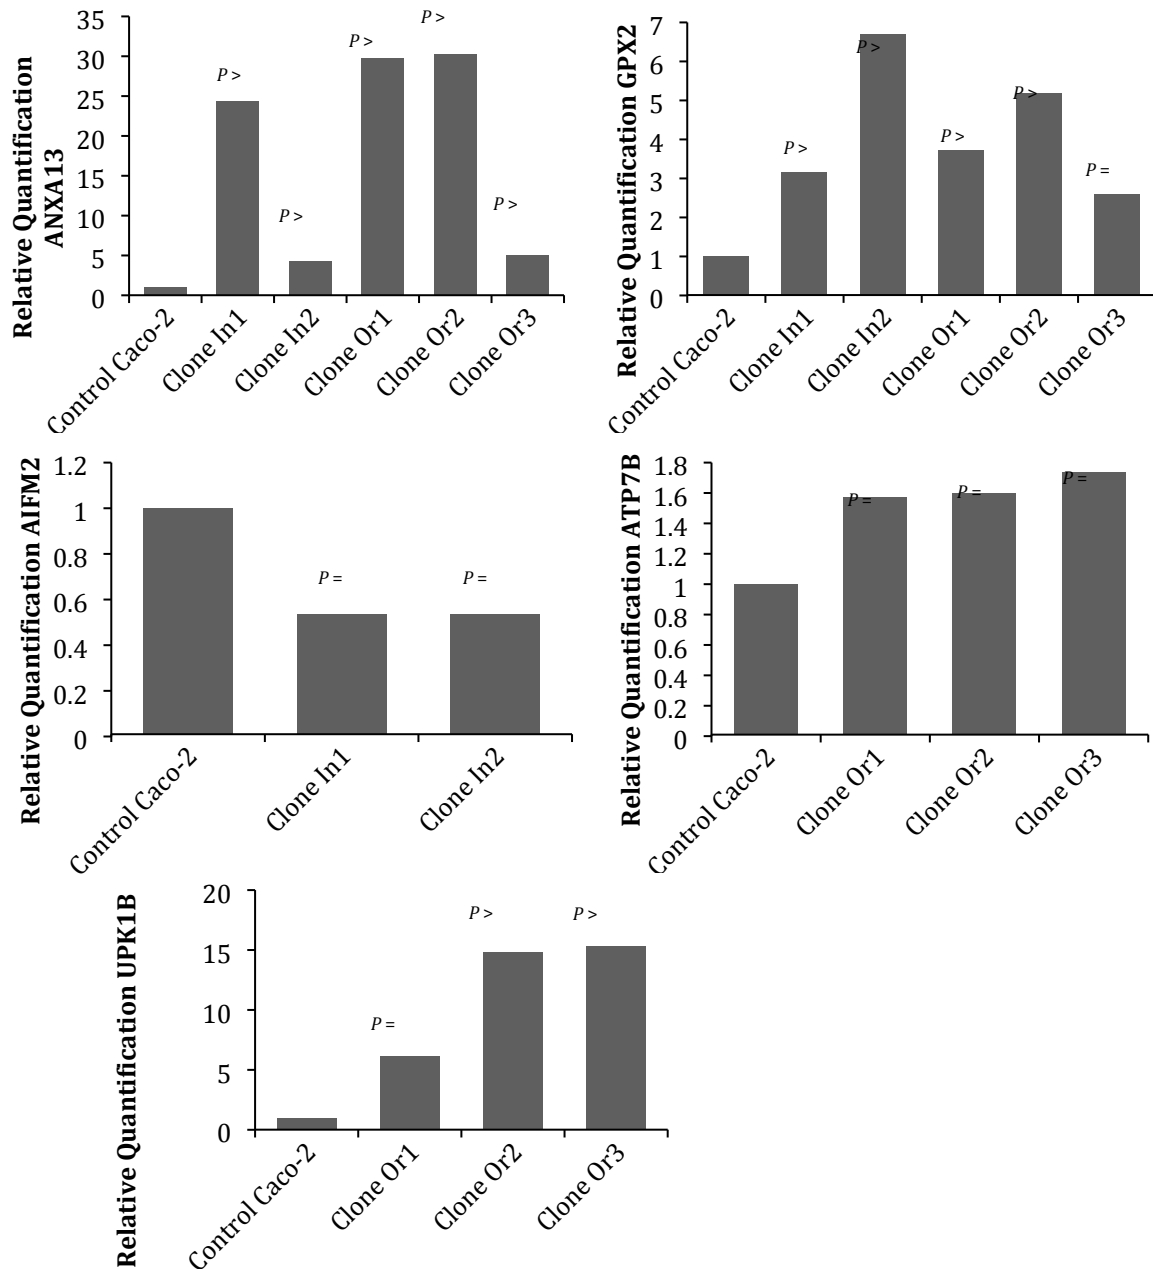

**Table S1.** List of primers for qRT-PCR, supplied by Invitrogen™ Custom DNA Oligos (Thermo Fischer)

| Gene name | Forward                    | Reverse                    |
|-----------|----------------------------|----------------------------|
| ANXA13    | 5'-GGTTCGCTCAGATACCTCCG-3' | 5'-TTCCTATTGCCCTGGCTTGG-3' |
| ATP7B     | 5'-GTGGGCAATGACACCACTTT-3' | 5'-TGGGTGCCTTTGACATCTGA-3' |
| GPX2      | 5'-AGCTCATCATTGGAGCCCT-3'  | 5'-TTGATGGTTGGGAAGGTGCG-3' |
| AIFM2     | 5'-ATGGTTCGGCTGACCAAGAG-3' | 5'-GCCACCACATCATTGGCATC-3' |
| UROPLAKIN |                            |                            |
| 1B        | 5'-GGCGTAAATGGTCCATCAGA-3' | 5'-AGGCGTGTCGGTTCATTGGA-3' |
|           | 5'-                        | 5'-                        |
|           | TGGACATCCGCAAAGACCTGTA-    | TCAGGAGGAGCAATGATCTTGA-    |
| β-actin   | 3'                         | 3'                         |

**Table S2.** DAVID UniProt keywords associated with common differentially expressed genes >2 fold in at least 4 of 5 Cu-resistant Caco-2 clones (331 genes input into DAVID version 6.8). Only annotations with P value less than 0.05 shown.

|                              | Gene Count | <i>P</i> value |
|------------------------------|------------|----------------|
| Signal                       | 89         | 0.000025       |
| Glycoprotein                 | 95         | 0.00003        |
| Membrane                     | 135        | 0.00036        |
| Secreted                     | 47         | 0.00042        |
| Stress response              | 8          | 0.00054        |
| Annexin                      | 4          | 0.0009         |
| Calcium/phospholipid-binding | 4          | 0.0011         |
| Transmembrane helix          | 101        | 0.0044         |
| Chloride channel             | 5          | 0.0057         |
| Disulfide bond               | 64         | 0.015          |
| EGF-like domain              | 9          | 0.02           |
| Chloride                     | 5          | 0.02           |
| SH3 domain                   | 8          | 0.033          |
| Pyrrolidone carboxylic acid  | 5          | 0.043          |
